# Supplementary material
Source: ML conference proceedings conference paper supplement (https://proceedings.mlr.press/v97/ustun19a.html)
Supplement: Supplementary file [file ustun19a-supp.pdf]

## A. Proof of Theorem 2

In what follows, we present proofs of Theorem 2. We start a simple sufficient condition to ensure that a group prefers classifier  $h$  to another classifier  $h'$ . We will make use of this result to prove Theorem 2, and to design the score function for our decoupling procedure in Appendix B.

**Lemma 3 (Generalization of Preferences)** *Consider evaluating the true risk of two classifiers  $h$  and  $h'$  over group  $z$ . Given classifiers satisfy  $\hat{\Delta}_z(h, h') > 0$ , then  $\Delta_z(h, h') > 0$  with probability at least  $1 - \delta$  for any  $\delta \in (0, 1]$  if*

$$4\mathfrak{R}(\mathcal{H}) + \sqrt{\frac{2 \ln \frac{2}{\delta}}{n_z}} \leq \hat{\Delta}_z(h, h'), \quad (5)$$

where  $\mathfrak{R}(\mathcal{H})$  is the Rademacher complexity of the hypothesis class  $\mathcal{H}$ .

**Proof 1** For any group  $z \in Z$  and any classifier  $h \in \mathcal{H}$  with probability at least  $1 - \delta/2$ , we have that

$$|\hat{R}_z(h) - R_z(h)| \leq 2\mathfrak{R}(\mathcal{H}) + \sqrt{\frac{\ln \frac{2}{\delta}}{2n_z}}. \quad (6)$$

The bound in (6) holds for both  $h$  and  $h'$  with probability at least  $1 - \delta$ . Thus, we know that:

$$\begin{aligned} R_z(h') - R_z(h) &= (R_z(h') - \hat{R}_z(h')) + (\hat{R}_z(h) - R_z(h)) + \hat{R}_z(h') - \hat{R}_z(h) \\ &\geq - \left( 2\mathfrak{R}(\mathcal{H}) + \sqrt{\frac{\ln \frac{2}{\delta}}{2n_z}} \right) - \left( 2\mathfrak{R}(\mathcal{H}) + \sqrt{\frac{\ln \frac{2}{\delta}}{2n_z}} \right) + \hat{\Delta}_z(h, h') \\ &= - \left( 4\mathfrak{R}(\mathcal{H}) + \sqrt{\frac{2 \ln \frac{2}{\delta}}{n_z}} \right) + \hat{\Delta}_z(h, h') \\ &\geq 0, \end{aligned}$$

if the condition specified in (5) holds.

We can make use of Lemma 3 to produce the following bounds on the generalization of rationality and envy-freeness.<sup>6</sup>

**Corollary 4 (Generalization of Rationality)** *Given a set of decoupled classifiers  $H_Z = \{\hat{h}_z\}_{z \in Z}$  such that*

$$\hat{\Delta}_z(\hat{h}_z, \hat{h}_0) > 0 \quad \text{for all } z \in Z,$$

$H_Z$  satisfies rationality with respect the pooled classifier  $\hat{h}_0$  with probability at least  $1 - \delta$ , if for all groups  $z \in Z$ :

$$4\mathfrak{R}(\mathcal{H}) + \sqrt{\frac{2}{n_z} \ln \left( \frac{2|Z|}{\delta} \right)} \leq \hat{\Delta}_z(\hat{h}_z, \hat{h}_0),$$

**Corollary 5 (Generalization of Envy-freeness)** *Given a set of decoupled classifiers  $H_Z = \{\hat{h}_z\}_{z \in Z}$  such that*

$$\hat{\Delta}_z(\hat{h}_z, \hat{h}_{z'}) > 0 \quad \text{for all } z, z' \in Z,$$

$H_Z$  satisfies envy-freeness with probability at least  $1 - \delta$  if, for all pairs of groups  $z, z' \in Z$ :

$$4\mathfrak{R}(\mathcal{H}) + \sqrt{\frac{2}{n_z} \ln \left( \frac{|Z|^2}{\delta} \right)} \leq \hat{\Delta}_z(\hat{h}_z, \hat{h}_{z'}).$$

<sup>6</sup>For the sake of clarity, we will consider a setting where each group is assigned its own classifier so that  $a(z) = z$  for each  $z \neq z'$ . Similar results can be derived for a setting where a single classifier can be assigned to multiple groups (see e.g., Appendix B).

Both results follow from repeated applications of Lemma 2. Specifically:

- Rationality requires that the pairwise preferences in Lemma 2 hold for all groups  $z \in Z$ . This involves preference conditions for  $|Z|$  pairs of classifiers – i.e., one for each distinct pair  $\hat{h}_z, \hat{h}_0$  where  $z \in Z$ . Thus, we can ensure that rationality holds with probability at least  $1 - \delta$  by applying Lemma 2 with probability at least  $1 - \frac{\delta}{|Z|}$ .
- Envy-freeness requires that the pairwise preferences in Lemma 2 hold for all pairs of groups  $z, z' \in Z$ . This involves preference conditions on  $|Z|(|Z| - 1)/2$  pairs of classifiers – i.e., one for each distinct pair  $\hat{h}_z, \hat{h}_{z'}$  where  $z, z' \in Z$ . Since there are  $|Z|(|Z| - 1)/2$  pairs, and that  $|Z|(|Z| - 1)/2 \leq |Z|^2/2$ , we can ensure that envy-freeness hold with probability at least  $1 - \delta$  by applying Lemma 2 with probability at least  $\frac{\delta}{|Z|^2/2}$ .

We are now ready to prove Theorem 2.

**Proof 2 (Theorem 2)** *Using Massart’s Lemma, we have that:*

$$\mathfrak{R}(\mathcal{H}) \leq \sqrt{\frac{2 \log |\mathcal{H}|}{n_z}} \quad (7)$$

Combining the bound on  $\mathfrak{R}(\mathcal{H})$  in (7) with the bound in Corollary 4, we have that  $H_Z$  satisfies rationality with probability at least  $1 - \delta$ , if for all  $z \in Z$ ,

$$n_z \geq \frac{64 \ln |\mathcal{H}| + 4 \ln \left( \frac{2|Z|}{\delta} \right)}{\hat{\Delta}_z(\hat{h}_z, \hat{h}_0)^2} \quad (8)$$

Likewise, combining the bound on  $\mathfrak{R}(\mathcal{H})$  in (7) with the bound in Corollary 5, we have that  $H_Z$  satisfies envy-freeness with probability at least  $1 - \delta$  if for all  $z \in Z$ ,

$$n_z \geq \frac{64 \ln |\mathcal{H}| + 4 \ln \left( \frac{|Z|^2}{\delta} \right)}{\hat{\Delta}_z(\hat{h}_z, \hat{h}_{z'})^2}. \quad (9)$$

Given the bounds in (8) and (9), we can see that  $H_Z$  satisfies both rationality and envy-freeness with probability at least  $1 - \delta$  if for all  $z \in Z$ ,

$$n_z \geq \max \left\{ \frac{64 \ln |\mathcal{H}| + 4 \ln \left( \frac{2|Z|}{\delta} \right)}{\hat{\Delta}_z(\hat{h}_z, \hat{h}_0)^2}, \frac{64 \ln |\mathcal{H}| + 4 \ln \left( \frac{|Z|^2}{\delta} \right)}{\hat{\Delta}_z(\hat{h}_z, \hat{h}_{z'})^2} \right\} \quad (10)$$

Thus, the bound in Theorem 2 holds so long as we can show that:

$$\frac{64 \ln |\mathcal{H}| + 4 \ln \left( \frac{2|Z|^2}{\delta} \right)}{\hat{\epsilon}_z^2} \geq \max \left\{ \frac{64 \ln |\mathcal{H}| + 4 \ln \left( \frac{2|Z|}{\delta} \right)}{\hat{\Delta}_z(\hat{h}_z, \hat{h}_0)^2}, \frac{64 \ln |\mathcal{H}| + 4 \ln \left( \frac{|Z|^2}{\delta} \right)}{\hat{\Delta}_z(\hat{h}_z, \hat{h}_{z'})^2} \right\} \quad (11)$$

This follows given that we have defined  $\hat{\epsilon}_z = \min \left( \hat{\Delta}_z(\hat{h}_z, \hat{h}_0), \min_{z' \in Z/\{z\}} \hat{\Delta}_z(\hat{h}_z, \hat{h}_{z'}) \right)$ , and that the inequality  $4 \ln \left( \frac{|Z|^2}{\delta} \right) \geq 4 \ln \left( \frac{2|Z|}{\delta} \right)$  holds whenever  $|Z| \geq 2$ .

## B. Score Function

In what follows, we formally derive the score function that we present in Section 4. The score function ensures that our procedure grows a tree in a way that is aligned with the goal of minimizing the risk of a preference violation.

We wish to bound the probability that  $H_T$  violates rationality or envy-freeness as follows:

$$\mathbb{P}\left(\begin{array}{l} H_T \text{ violates} \\ \text{rationality or} \\ \text{envy-freeness} \end{array}\right) \leq \text{ViolationScore}(T) = \sum_{z \in Z} 4 \exp\left(-\frac{n_z}{2} \cdot \hat{\Delta}_z(\hat{h}_z, \hat{h}_0)^2\right) + \sum_{z \in Z} \sum_{\substack{z' \in Z \\ a(z') \neq a(z)}} 4 \exp\left(-\frac{n_z}{2} \cdot \hat{\Delta}_z(\hat{h}_z, \hat{h}_{z'})^2\right)$$

We restrict our attention to cases where  $\hat{\Delta}_z(z, z') > 0$  since our training procedure ensures that  $\hat{\Delta}_z(z, z') \geq 0$ , and since  $\hat{\Delta}_z(z, z') = 0$  implies indifference (i.e., it does not imply a preference violation).

Given a pair groups  $z, z' \in Z$  such that  $a(z) \neq a(z')$ , we denote an event where group  $z$  prefers the classifier assigned to group  $z'$  as  $\mathcal{E}_{z \rightarrow z'}$ . We will bound the probability of  $\mathcal{E}_{z \rightarrow z'}$  in terms of the following event:

$$\mathcal{E}_{z, z'} = \left\{ |R_z(\hat{h}_z) - \hat{R}_z(\hat{h}_z)| \geq \frac{\hat{\Delta}_z(\hat{h}_z, \hat{h}_{z'})}{2} \right\} \cup \left\{ |R_z(\hat{h}_{z'}) - \hat{R}_z(\hat{h}_{z'})| \geq \frac{\hat{\Delta}_z(\hat{h}_z, \hat{h}_{z'})}{2} \right\}$$

We observe that  $\mathcal{E}_{z \rightarrow z'} \subseteq \mathcal{E}_{z, z'}$ . We proceed to present a proof by contradiction. Suppose that  $\mathcal{E}_{z \rightarrow z'} \not\subseteq \mathcal{E}_{z, z'}$ , this means that there must exist an event  $\omega \in \mathcal{E}_{z \rightarrow z'}$  such that  $\omega \notin \mathcal{E}_{z, z'}$ . The fact that  $\omega \notin \mathcal{E}_{z, z'}$  implies that both of the following inequalities must hold:

$$\begin{aligned} |R_z(\hat{h}_z) - \hat{R}_z(\hat{h}_z)| &< \frac{\hat{\Delta}_z(\hat{h}_z, \hat{h}_{z'})}{2} \\ |R_z(\hat{h}_{z'}) - \hat{R}_z(\hat{h}_{z'})| &< \frac{\hat{\Delta}_z(\hat{h}_z, \hat{h}_{z'})}{2} \end{aligned}$$

This implies:

$$\begin{aligned} R_z(\hat{h}_z) - R_z(\hat{h}_{z'}) &= (R_z(\hat{h}_z) - \hat{R}_z(\hat{h}_z)) + (\hat{R}_z(\hat{h}_z) - \hat{R}_z(\hat{h}_{z'})) + (\hat{R}_z(\hat{h}_{z'}) - R_z(\hat{h}_{z'})) \\ &< \frac{\hat{\Delta}_z(\hat{h}_z, \hat{h}_{z'})}{2} - \hat{\Delta}_z(\hat{h}_z, \hat{h}_{z'}) + \frac{\hat{\Delta}_z(\hat{h}_z, \hat{h}_{z'})}{2} \\ &= 0. \end{aligned}$$

Thus, we have shown that  $z$  does not envy  $z'$ , which contradicts the fact that  $\omega \in \mathcal{E}_{z \rightarrow z'}$ .

Having shown that  $\mathcal{E}_{z \rightarrow z'} \subseteq \mathcal{E}_{z, z'}$ , we can bound the probability of an envy-freeness violation as follows:

$$\mathbb{P}(\cup_{z, z'} \mathcal{E}_{z \rightarrow z'}) \leq \mathbb{P}(\cup_{z, z'} \mathcal{E}_{z, z'}) \tag{12}$$

$$\leq \sum_{\substack{z, z' \in Z \\ a(z) \neq a(z')}} \mathbb{P}(\mathcal{E}_{z, z'}) \tag{13}$$

$$\leq \sum_{\substack{z, z' \in Z \\ a(z) \neq a(z')}} \mathbb{P}\left(|R_z(\hat{h}_z) - \hat{R}_z(\hat{h}_z)| \geq \frac{\hat{\Delta}_z(\hat{h}_z, \hat{h}_{z'})}{2}\right) + \mathbb{P}\left(|R_z(\hat{h}_{z'}) - \hat{R}_z(\hat{h}_{z'})| \geq \frac{\hat{\Delta}_z(\hat{h}_z, \hat{h}_{z'})}{2}\right) \tag{14}$$

$$\leq \sum_{\substack{z, z' \in Z \\ a(z) \neq a(z')}} 2 \exp\left(-2n_z \left(\frac{\hat{\Delta}_z(\hat{h}_z, \hat{h}_{z'})}{2}\right)^2\right) + 2 \exp\left(-2n_z \left(\frac{\hat{\Delta}_z(\hat{h}_z, \hat{h}_{z'})}{2}\right)^2\right) \tag{15}$$

$$= \sum_{\substack{z, z' \in Z \\ a(z) \neq a(z')}} 4 \exp\left(-\frac{n_z}{2} \cdot \hat{\Delta}_z(\hat{h}_z, \hat{h}_{z'})^2\right) \tag{16}$$

Here: (12) follows from the fact that  $\mathcal{E}_{z \rightarrow z'} \subseteq \mathcal{E}_{z, z'}$ ; (13) and (14) follow from the union bound; and (15) follows from inverting the bound.

We bound the probability of a rationality violation in a similar manner. We first define the following event for each  $z \in Z$ :

$$\mathcal{E}_{z,0} = \left\{ |R_z(\hat{h}_z) - \hat{R}_z(\hat{h}_z)| \geq \frac{\hat{\Delta}_z(\hat{h}_z, \hat{h}_0)}{2} \right\} \cup \left\{ |R_z(\hat{h}_0) - \hat{R}_z(\hat{h}_0)| \geq \frac{\hat{\Delta}_z(\hat{h}_z, \hat{h}_0)}{2} \right\}$$

We note that  $\mathcal{E}_{z \rightarrow 0} \subseteq \mathcal{E}_{z,0}$ , which can be shown by deriving an analogous contradiction to the one derived for envy-freeness. With this result, we can bound the probability of an rationality violation as follows:

$$\mathbb{P}(\cup_{z \in Z} \mathcal{E}_{z \rightarrow 0}) \leq \mathbb{P}(\cup_{z \in Z} \mathcal{E}_{z,0}) \tag{17}$$

$$\leq \sum_{z \in Z} \mathbb{P}(\mathcal{E}_{z,0}) \tag{18}$$

$$\leq \sum_{z \in Z} \mathbb{P}\left(|R_z(\hat{h}_z) - \hat{R}_z(\hat{h}_z)| \geq \frac{\hat{\Delta}_z(\hat{h}_z, \hat{h}_0)}{2}\right) + \mathbb{P}\left(|R_z(\hat{h}_0) - \hat{R}_z(\hat{h}_0)| \geq \frac{\hat{\Delta}_z(\hat{h}_z, \hat{h}_0)}{2}\right) \tag{19}$$

$$\leq \sum_{z \in Z} 2 \exp\left(-2n_z \left(\frac{\hat{\Delta}_z(\hat{h}_z, \hat{h}_0)}{2}\right)^2\right) + 2 \exp\left(-2n_z \left(\frac{\hat{\Delta}_z(\hat{h}_z, \hat{h}_0)}{2}\right)^2\right) \tag{20}$$

$$= \sum_{z \in Z} 4 \exp\left(-\frac{n_z}{2} \cdot \hat{\Delta}_z(\hat{h}_z, \hat{h}_0)^2\right) \tag{21}$$

Here: (17) follows from the fact that  $\mathcal{E}_{z \rightarrow 0} \subseteq \mathcal{E}_{z,0}$ ; (18) and (19) follow from the union bound; and (20) follows from inverting the bound. Our final expression for the score function is obtained by combining the terms in (16) and (21).
